# Supplementary material for: Disruption of the Expression of the Placental Clock and Melatonin Genes in Preeclampsia
Source: MDPI journal article supplement (doi:10.3390/ijms24032363), 2023-01-25
Supplement: s1 [file s1]

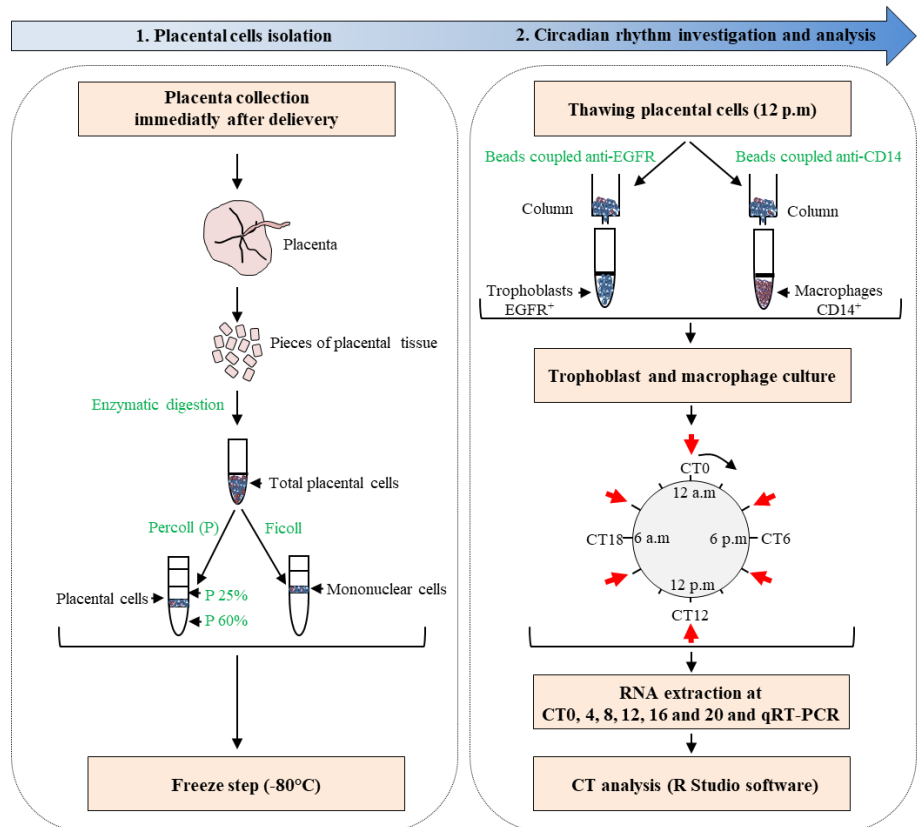

**Supplemental figure 1. Schematic representation of the method used from the placental cell isolation to circadian rhythm investigation.**

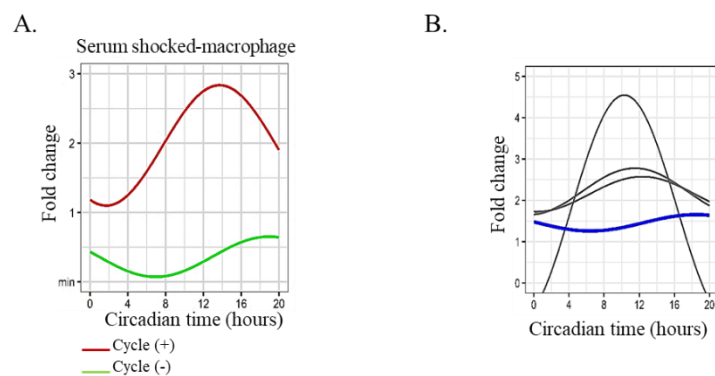

**Supplemental figure 2. Macrophage and circadian rhythm**

(A) Macrophages from six healthy donors were synchronized with 50% FBS for 2 hours before CT0. The mean of the fold change of 6 biological replicates was represented in red and green for macrophages with ( $n=3$ ) and without ( $n=3$ ) cycles, respectively. Each sinusoid (in gray) represents the expression of the clock genes over time for each donor after adjustment of the values by the

*Cosinor model (mean of 3 technical replicates for each donor). The mean of the fold change of biological replicates was represented in blue. The statistical analysis was performed using the Cosinor function using R studio.*

**Supplemental Table 1. List of primers**

| Gene symbol  | Forward primer (5'-3')      | Reverse primer (3'-5')   |
|--------------|-----------------------------|--------------------------|
| <i>ACBT</i>  | GGAAATCGTGCGTGACATTA        | AGGAAGGAAGGCTGGAAGAG     |
| <i>BMAL1</i> | AAACCAACTTTTCTATCAGACGATGAA | TCGGTCACATCCTACGACAAAC   |
| <i>CLOCK</i> | AAGTTAGGGCTGAAAGACGACG      | GAACTCCGAGAAGAGGCAGAAG   |
| <i>PER2</i>  | CGGAGTTAGAGATGGTGGGAAGA     | GGGACTGGAAAATGCTGAGTT    |
| <i>CRY2</i>  | CATGGCGACAGTCAGCAAAC        | ACGTTTCCCACCACTGAGAG     |
| <i>NR1D1</i> | AGAGCACCAGCAACATCACCAAGC    | TTCTTGAAGCGACATTGCTGGCAG |
| <i>MT2</i>   | AACTGCTGCGAGGCG             | GGCGGTGGTGACGATG         |
| <i>AANAT</i> | AATCAGAAGGGAACAGTA          | TGGATGACAAATAGACAAG      |
| <i>ASMT</i>  | GGGCGTGTTTGACCTTCTCG        | GCTCGCCCTCGGACCTGTAG     |

**Supplemental Table 2. Rhythmic parameters (mesor, amplitude and acrophase) for macrophages co-cultured with trophoblasts for 1 day. A p value <0.05 for mesor, amplitude and acrophase implies a rhythmicity of the investigated gene**

| Gene         | Mesor | CI 95%       | P      | Amplitude | CI 95%       | P      | Acrophase | CI 95%         | P      |
|--------------|-------|--------------|--------|-----------|--------------|--------|-----------|----------------|--------|
| <i>BMAL1</i> | 1.64  | (1.17; 2.11) | <0.001 | 1.3       | (0.68; 2.00) | <0.001 | 16.99     | (15.12; 18.87) | <0.001 |
| <i>CLOCK</i> | 1.26  | (0.81; 1.97) | <0.001 | 1.39      | (0.82; 1.97) | <0.001 | 13.08     | (11.50; 14.66) | 0.18   |
| <i>CRY2</i>  | 3.07  | (1.98; 4.17) | <0.001 | 1.87      | (0.33; 3.41) | 0.02   | 11.70     | (8.55; 14.85)  | 0.85   |
| <i>PER2</i>  | 0.91  | (0.55; 1.27) | <0.001 | 0.83      | (0.31; 1.33) | 0.001  | 7.84      | (5.48; 10.19)  | <0.001 |
| <i>NR1D1</i> | 1.27  | (0.90; 1.64) | <0.001 | 1.49      | (0.96; 2.01) | <0.001 | 13.76     | (12.41; 15.11) | 0.01   |
